# Supplementary material
Source: PubMed Central journal article supplement (PMC7771025)

## Supporting Information for:

*Lythrum salicaria* Ellagitannins Stimulate IPEC-J2 Cells Monolayer Formation and Inhibit Enteropathogenic *Escherichia coli* Growth and Adhesion.

Sebastian Granica,<sup>†,‡</sup> Wilfried Vahjen,<sup>§</sup> Jürgen Zentek,<sup>§</sup> Matthias F. Melzig,<sup>^</sup> Karolina A. Pawłowska,<sup>†,‡</sup> and Jakub P. Piwowarski\*<sup>†,‡,§,^</sup>

<sup>†</sup>Department of Pharmacognosy and Molecular Basis of Phytotherapy, and <sup>‡</sup>Centre for Preclinical Studies, Medical University of Warsaw, Poland

<sup>§</sup>Institute of Animal Nutrition, and <sup>^</sup>Department of Pharmaceutical Biology, Freie Universität Berlin, Germany

## Corresponding Author

**Jakub P. Piwowarski** – Department of Pharmacognosy and Molecular Basis of Phytotherapy, Faculty of Pharmacy, Medical University of Warsaw, Banacha 1, Warsaw 02-097, Poland; Institute of Animal Nutrition, and Department of Pharmaceutical Biology, Freie Universität Berlin, Germany; [orcid.org/0000-0002-5011-0983](https://orcid.org/0000-0002-5011-0983); Phone: +48 225720953; Email: [jpiwowarski@wum.edu.pl](mailto:jpiwowarski@wum.edu.pl)

**Figure S1.** UPLC-DAD-MS chromatograms of *Lythrum salicaria* L. aqueous extract (LSH) recorded at 254 nm and structures of dominating ellagitannins: castalagin (**1**), vescalagin (**2**), salicarinin A (**3**) and salicarinin B (**4**).

UPLC-DAD-MS analysis conditions:  
 Reversed-phase Kinetex C8 analytical column (100mm×2.1mm×1.7μm), Phenomenex (Torrance, CA, USA). The column temperature was 25°C. Mobile phase A was 0.1% HCOOH in water (v/v) and mobile phase B was 0.1% HCOOH in MeCN (v/v). A multistep gradient solvent system used: 0–5 min 0% B, 5–35 min 0–35% B. The flow rate was 0.2 mL/min.

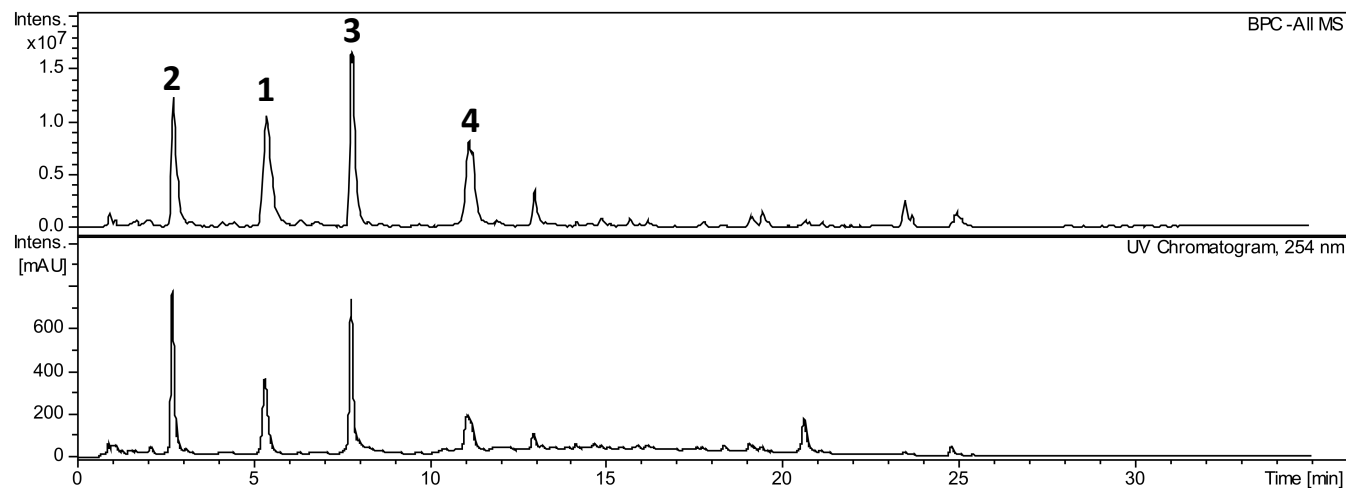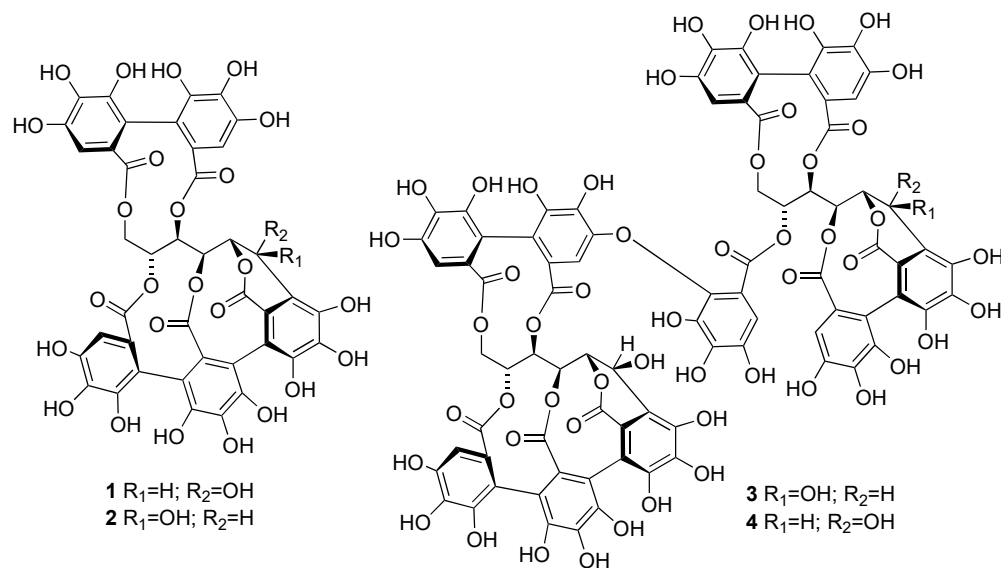

**Figure S2.** Structures of tested gut microbiota metabolites: urolithin C (**5**), urolithin A (**6**) and its phase II conjugate-mixture of urolithin A 3-*O*-glucuronide and 8-*O*-glucuronide urolithin A glucuronide (**7**).

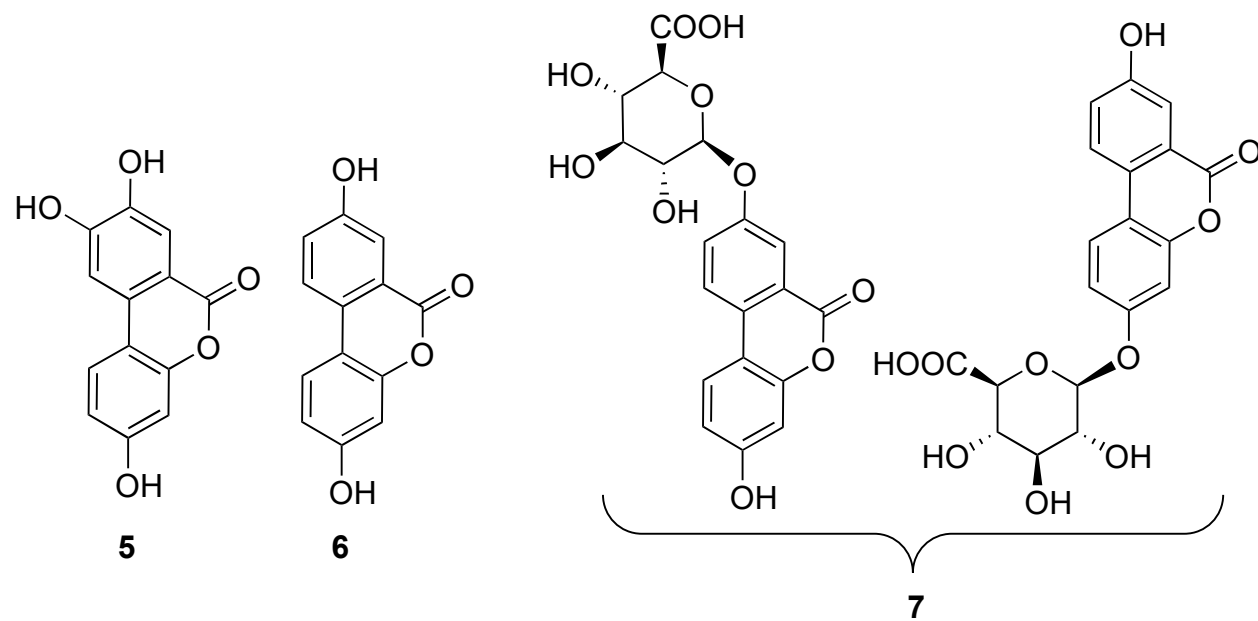

**Figure S3A.** Growth curves of enteropathogenic *E. coli* strain: IMT O147:K89:K88 (Abbottstown) (A and B) and control strain: DSM 2840 (C and D) incubated with *Lythrum salicaria* extract (LSH) (A and C) or castalagin (**1**) (B and D). The data are representative for three independent experiments assayed in triplicate. Doubling time (G) and lag time ( $\lambda$ ) values are

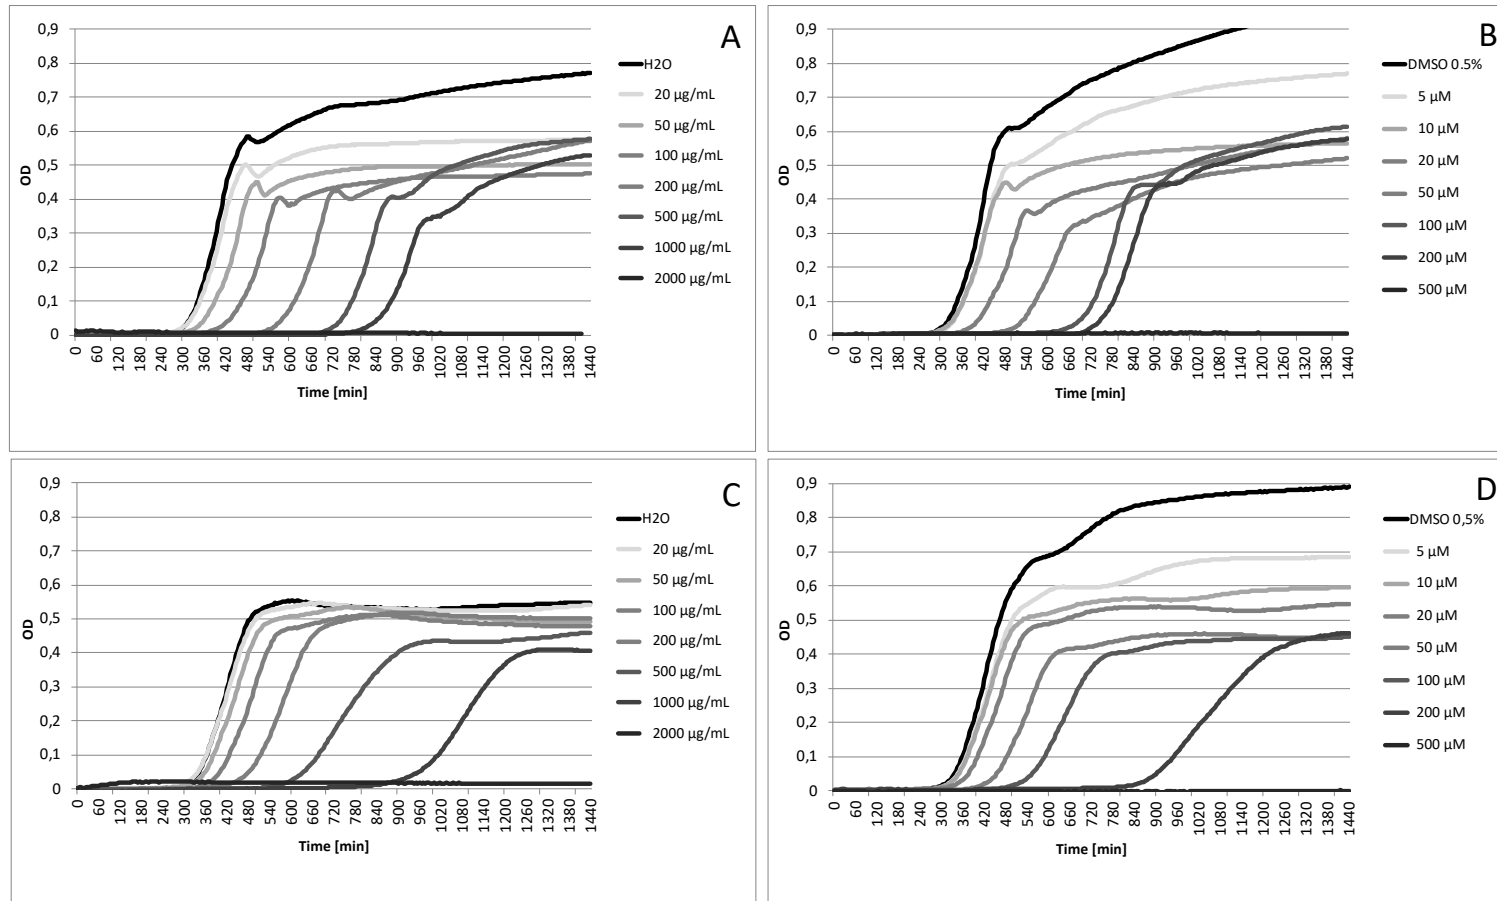

**Figure S3B.** Growth curves of enteropathogenic *E. coli* strain IMT O147:K89:K88 (Abbottstown) incubated with urolithin C (5) (A), urolithin A (6) (B) and with its phase II conjugate- mixture of urolithin A 3-O-glucuronide and 8-O-glucuronide urolithin A glucuronide (7) (C).

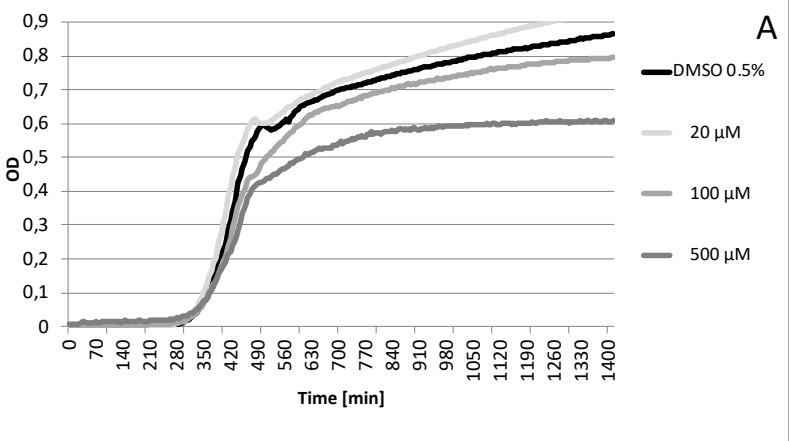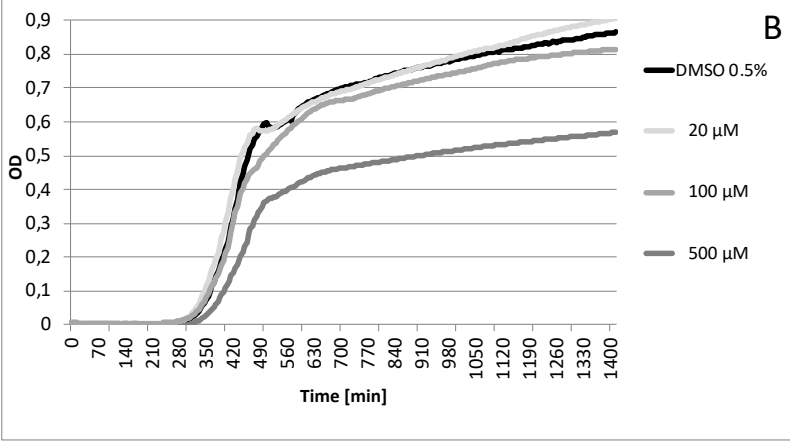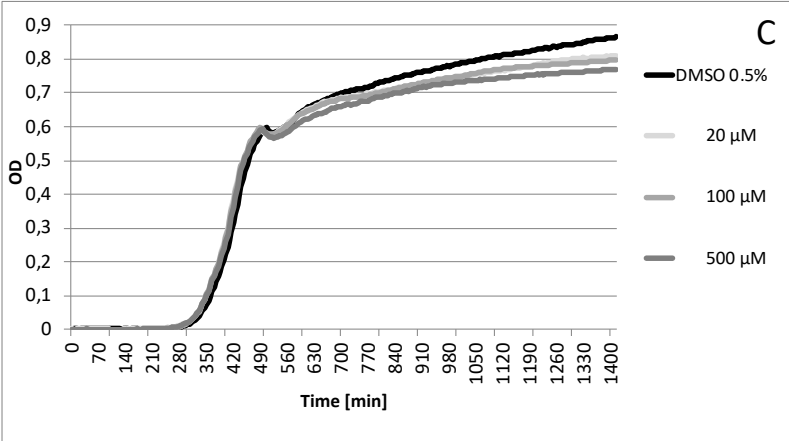

**Figure S3C.** Growth curves of enteropathogenic *E. coli* strain IMT O147:K89:K88 (Abbottstown) (A) and control strain DSM 2840 (B) incubated with positive control- ciprofloxacin.

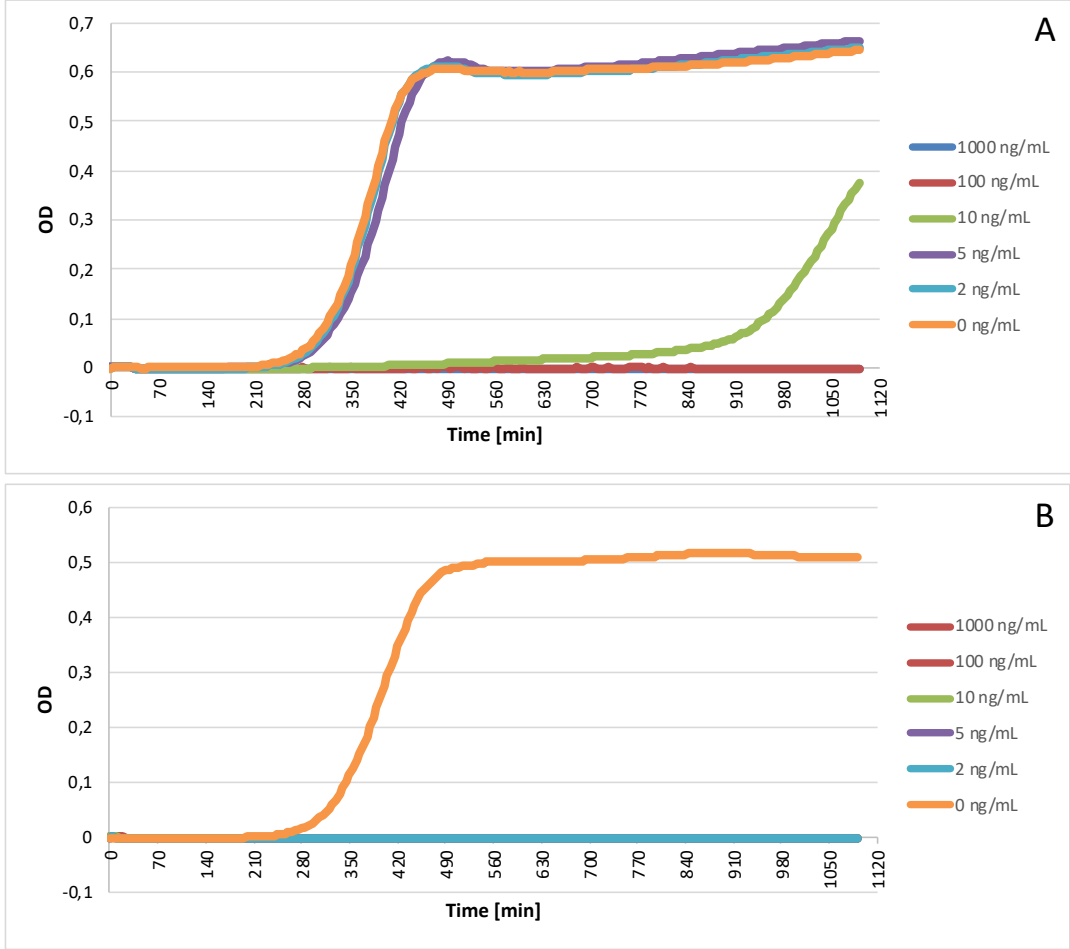

**Figure S4.** Growth curves of enteropathogenic *E. coli* strain: IMT O147:K89:K88 in piglets fecal samples monitored by qPCR determination of fimbrial *fae* gene copies. Growth curves for increasing *E. coli* inoculum ( $10^3$ -  $10^6$  CFU/mL). pc- pure *E. coli* culture (BHI), M-fecal sample.

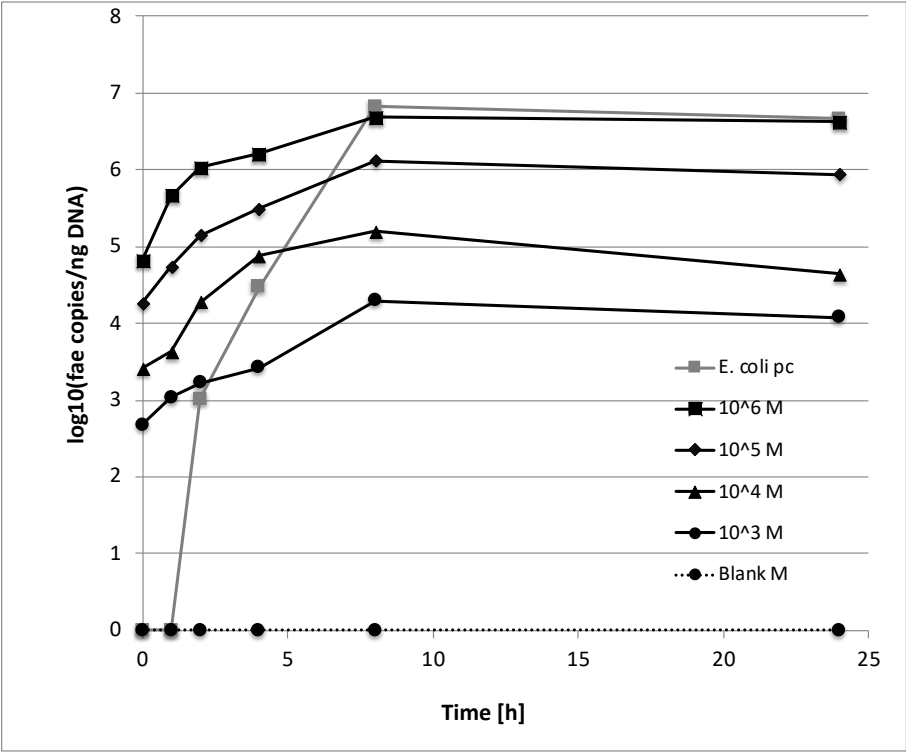

**Figure S5.** Influence of LSH and castalagin (**1**) on IPEC-J2 cell viability determined by propidium iodide (PI) staining followed by FACS analysis. Statistical significance \* $p < 0.05$ , \*\* $p < 0.01$  increase versus PBS control (Dunnett's post-hoc test).

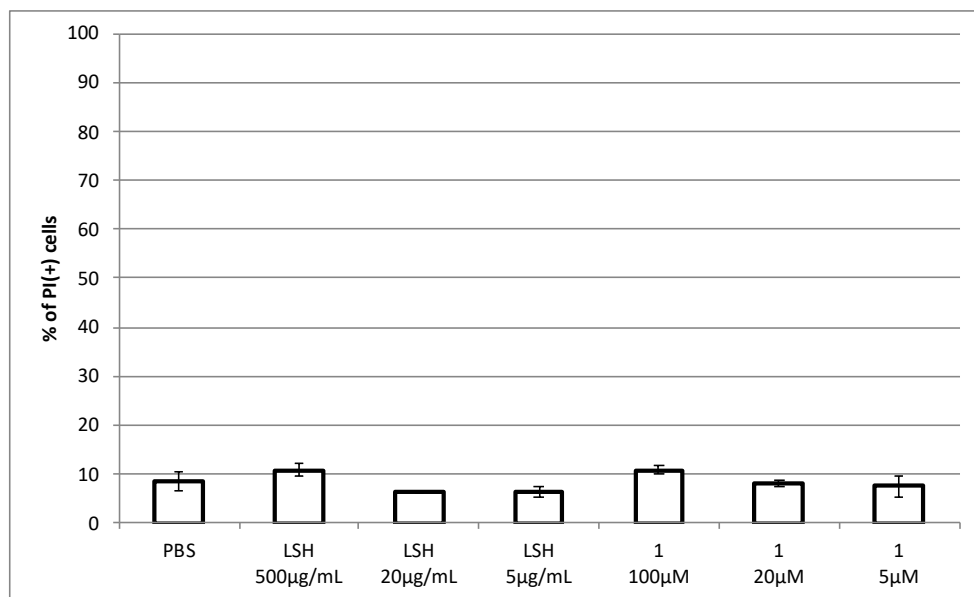



**Figure S6.** Changes in TEER of IPEC-J2 cells monolayers incubated from day 7 with medium containing urolithin C (**5**), urolithin A (**6**) and its phase II conjugate- mixture of urolithin A 3-*O*-glucuronide and 8-*O*-glucuronide urolithin A glucuronide (**7**) at the concentration of 50  $\mu$ M.

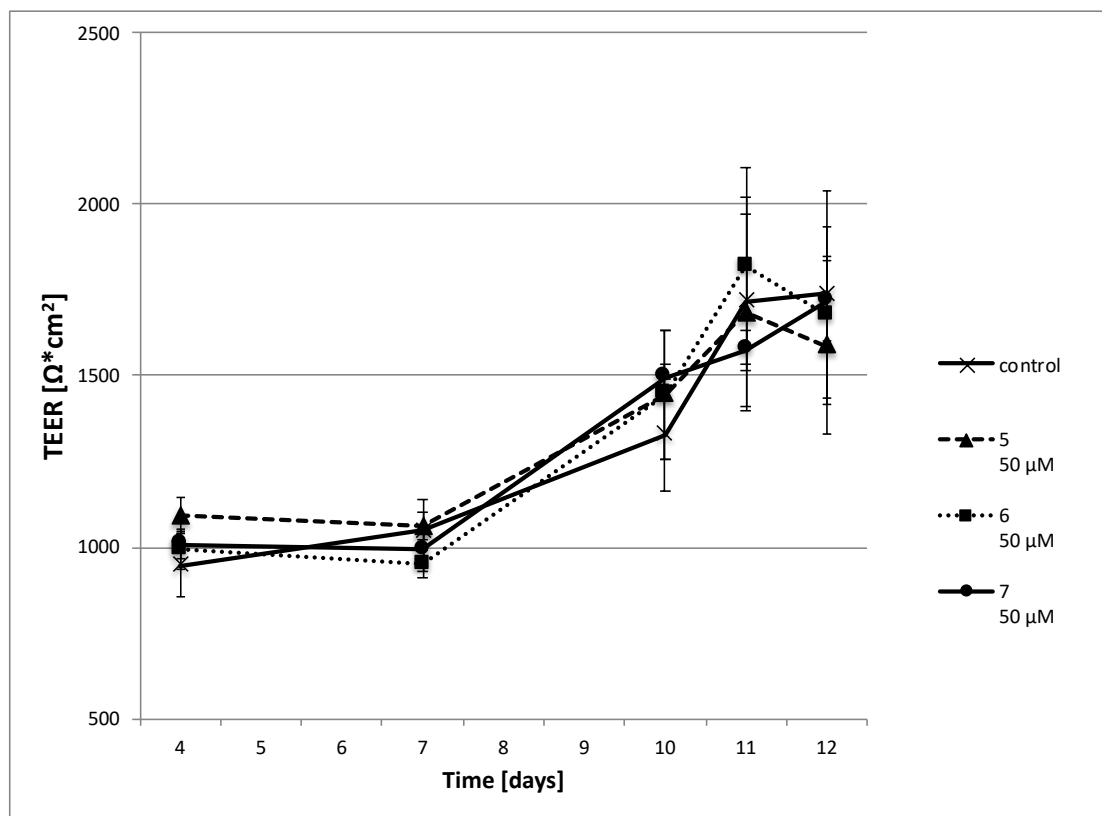

**Figure S7.** UPLC-DAD-MS analysis of different *Lythrum salicaria* L. extracts recorded at 254 nm with DAD device UPLC-DAD-MS analysis conditions: Reversed-phase Kinetex C8 analytical column (150mm×2.1mm×1.7µm), Phenomenex (Torrance, CA, USA). The column temperature was 25°C. Mobile phase A was 0.1% HCOOH in water (v/v) and mobile phase B was 0.1% HCOOH in MeCN (v/v). A multistep gradient solvent system used: 0–5 min 0% B, 5–35 min 0–35% B. The flow rate was 0.3 mL/min.

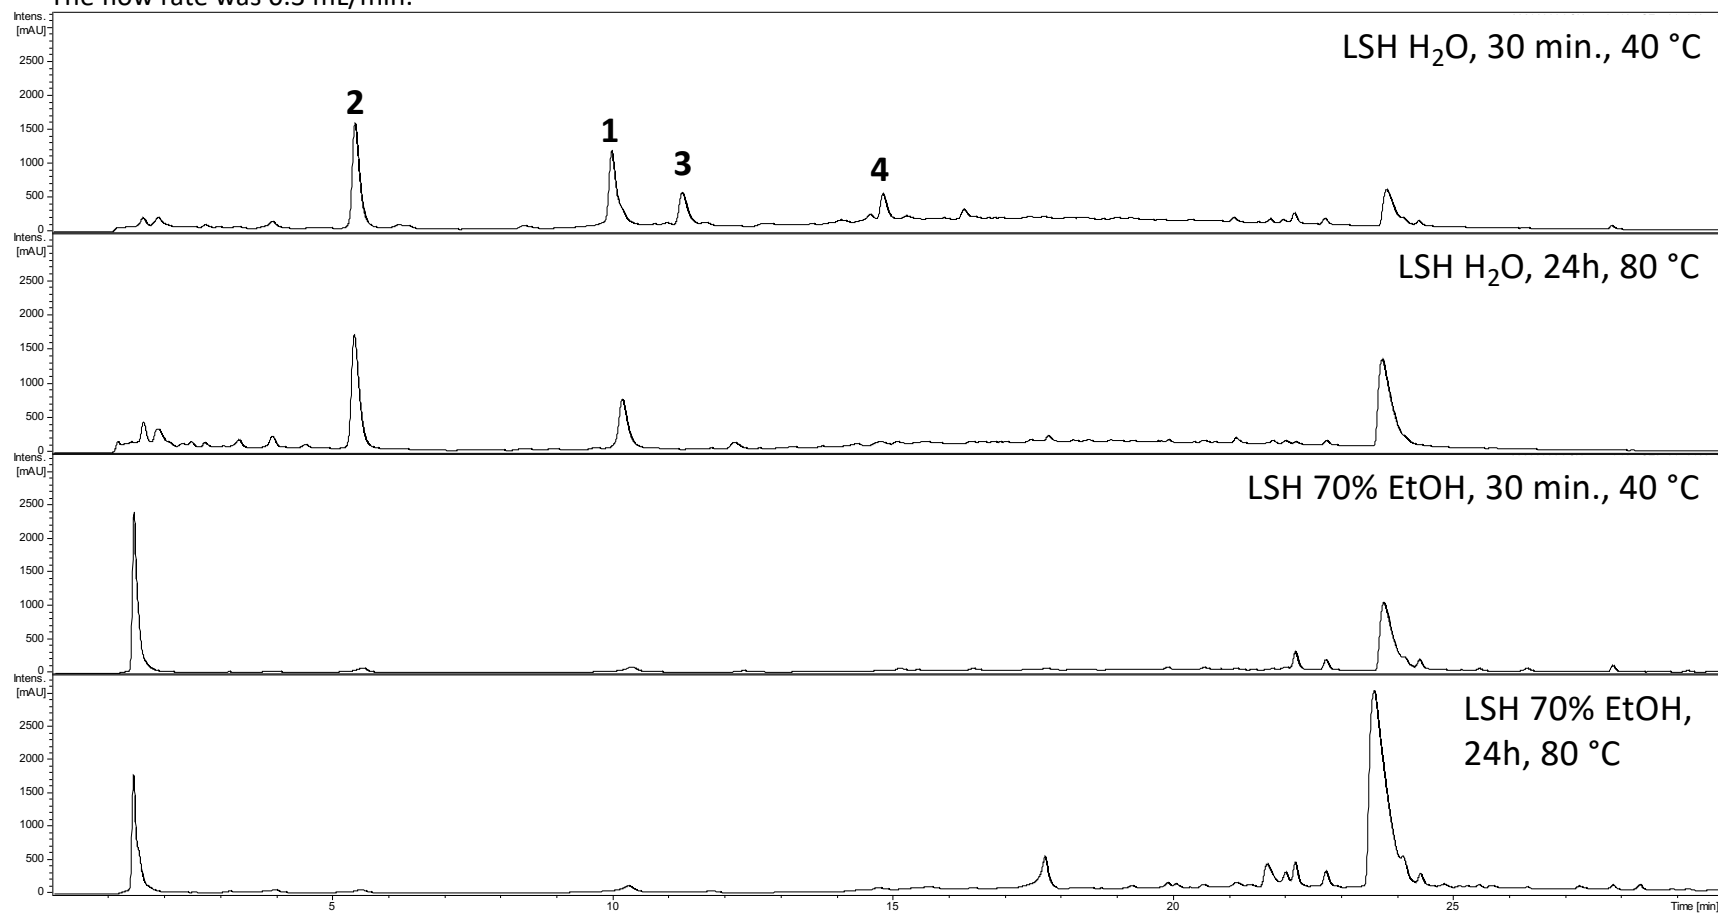

Supplement: np0c00776_si_001.pdf [file np0c00776_si_001.pdf]
