# Supplementary material
Source: PubMed Central journal article supplement (PMC7771025)

## Supporting Information for:

*Lythrum salicaria* Ellagitannins Stimulate IPEC-J2 Cells Monolayer Formation and Inhibit Enteropathogenic *Escherichia coli* Growth and Adhesion.

Sebastian Granica,<sup>†,‡</sup> Wilfried Vahjen,<sup>§</sup> Jürgen Zentek,<sup>§</sup> Matthias F. Melzig,<sup>^</sup> Karolina A. Pawłowska,<sup>†,‡</sup> and Jakub P. Piwowarski\*<sup>†,‡,§,^</sup>

<sup>†</sup>Department of Pharmacognosy and Molecular Basis of Phytotherapy, and <sup>‡</sup>Centre for Preclinical Studies, Medical University of Warsaw, Poland

<sup>§</sup>Institute of Animal Nutrition, and <sup>^</sup>Department of Pharmaceutical Biology, Freie Universität Berlin, Germany

## Corresponding Author

**Jakub P. Piwowarski** – Department of Pharmacognosy and Molecular Basis of Phytotherapy, Faculty of Pharmacy, Medical University of Warsaw, Banacha 1, Warsaw 02-097, Poland; Institute of Animal Nutrition, and Department of Pharmaceutical Biology, Freie Universität Berlin, Germany; [orcid.org/0000-0002-5011-0983](https://orcid.org/0000-0002-5011-0983); Phone: +48 225720953; Email: [jpiwowarski@wum.edu.pl](mailto:jpiwowarski@wum.edu.pl)

**Table S1.** Changes in tight junction proteins (TJ) expression determined using Western blot of proteins from each well at the end of conducted experiment of IPEC-J2 cells monolayers incubated from day 7 with medium containing Lythrum salicaria extract (LSH) at concentration of 100 and 500 µg/mL, castalagin (1), vesicalagin (2), salicarinin A (3) or salicarinin B (4) at the concentration 20 µM. Densitometric analysis was performed using ImageJ software.

| 15 µg protein per lane | PBS   | PBS   | PBS   | LSH 100 | LSH 100 | LSH 100 | LSH 500 | LSH 500 | LSH 500 | PBS  | LSH 100 µg/mL | LSH 500 µg/mL |      |
|------------------------|-------|-------|-------|---------|---------|---------|---------|---------|---------|------|---------------|---------------|------|
| Claudin 3 22 kDa       |       |       |       |         |         |         |         |         |         | mean | 0.81          | 0.90          | 0.62 |
|                        |       |       |       |         |         |         |         |         |         | SD   | 0.33          | 0.13          | 0.13 |
| /actin                 | 27.48 | 38.72 | 54.68 | 39.41   | 44.76   | 34.33   | 29.08   | 31.92   | 23.09   | 1.00 | 1.11          | 0.76          |      |
|                        | 0.47  | 0.85  | 1.11  | 0.88    | 1.05    | 0.78    | 0.68    | 0.70    | 0.47    | 0.40 | 0.16          | 0.16          |      |
| rel (meanPBS)          | 0.58  | 1.05  | 1.37  | 1.09    | 1.29    | 0.96    | 0.83    | 0.87    | 0.58    | 1.00 | 1.11          | 0.76          |      |
|                        |       |       |       |         |         |         |         |         |         | SD   | 0.32          | 0.08          | 0.18 |
| Claudin 4 22 kDa       |       |       |       |         |         |         |         |         |         | mean | 0.68          | 1.11          | 1.20 |
|                        |       |       |       |         |         |         |         |         |         | SD   | 0.32          | 0.08          | 0.18 |
| /actin                 | 18.69 | 35.56 | 45.49 | 46.94   | 46.87   | 52.53   | 60.27   | 48.13   | 55.90   | 1.00 | 1.65          | 1.77          |      |
|                        | 0.32  | 0.79  | 0.93  | 1.05    | 1.09    | 1.20    | 1.40    | 1.06    | 1.14    | 0.47 | 0.11          | 0.26          |      |
| rel (meanPBS)          | 0.47  | 1.16  | 1.37  | 1.55    | 1.62    | 1.77    | 2.07    | 1.57    | 1.68    | 1.00 | 1.65          | 1.77          |      |
|                        |       |       |       |         |         |         |         |         |         | SD   | 0.39          | 0.79          | 0.65 |
| ZO-1 200 kDa           |       |       |       |         |         |         |         |         |         | mean | 0.31          | 0.59          | 0.55 |
|                        |       |       |       |         |         |         |         |         |         | SD   | 0.12          | 0.25          | 0.20 |
| /actin                 | 26.26 | 12.14 | 10.72 | 38.59   | 16.27   | 23.32   | 30.32   | 28.04   | 15.72   | 1.00 | 1.90          | 1.75          |      |
|                        | 0.45  | 0.27  | 0.22  | 0.86    | 0.38    | 0.53    | 0.70    | 0.62    | 0.32    | 0.39 | 0.79          | 0.65          |      |
| rel (meanPBS)          | 1.43  | 0.86  | 0.70  | 2.78    | 1.22    | 1.71    | 2.27    | 1.99    | 1.03    | 1.00 | 1.90          | 1.75          |      |
|                        |       |       |       |         |         |         |         |         |         | SD   | 0.39          | 0.79          | 0.65 |
| Actin 42 kDa           |       |       |       |         |         |         |         |         |         |      |               |               |      |
|                        | 58.87 | 45.24 | 49.15 | 44.73   | 42.83   | 43.92   | 43.05   | 45.44   | 49.25   |      |               |               |      |

  

|                  | PBS   | PBS   | PBS   | 1 (20 µM) | 1 (20 µM) | 1 (20 µM) | 2 (20 µM) | 2 (20 µM) | 2 (20 µM) | PBS  | 1 (20 µM) | 2 (20 µM) |      |
|------------------|-------|-------|-------|-----------|-----------|-----------|-----------|-----------|-----------|------|-----------|-----------|------|
| Claudin 3 22 kDa |       |       |       |           |           |           |           |           |           | mean | 0.71      | 0.79      | 0.67 |
|                  |       |       |       |           |           |           |           |           |           | SD   | 0.44      | 0.06      | 0.24 |
| /actin           | 11.80 | 46.98 | 50.27 | 45.36     | 39.28     | 44.84     | 52.46     | 40.34     | 21.22     | 1.00 | 1.12      | 1.00      |      |
|                  | 0.21  | 0.93  | 0.99  | 0.84      | 0.72      | 0.82      | 0.90      | 0.69      | 0.43      | 0.61 | 0.09      | 0.33      |      |
| rel (meanPBS)    | 0.29  | 1.31  | 1.40  | 1.19      | 1.02      | 1.15      | 1.27      | 0.96      | 0.60      | 1.00 | 1.12      | 1.00      |      |
|                  |       |       |       |           |           |           |           |           |           | SD   | 0.72      | 0.20      | 0.08 |
| Claudin 4 22 kDa |       |       |       |           |           |           |           |           |           | mean | 0.81      | 1.18      | 1.03 |
|                  |       |       |       |           |           |           |           |           |           | SD   | 0.58      | 0.16      | 0.07 |
| /actin           | 13.26 | 39.79 | 70.74 | 70.48     | 66.42     | 54.88     | 56.57     | 60.02     | 54.65     | 1.00 | 1.46      | 1.27      |      |
|                  | 0.24  | 0.79  | 1.40  | 1.31      | 1.23      | 1.00      | 0.97      | 1.02      | 1.11      | 0.72 | 0.20      | 0.08      |      |
| rel (meanPBS)    | 0.29  | 0.98  | 1.73  | 1.62      | 1.52      | 1.24      | 1.20      | 1.27      | 1.37      | 1.00 | 1.46      | 1.27      |      |
|                  |       |       |       |           |           |           |           |           |           | SD   | 0.15      | 0.41      | 0.55 |
| ZO-1 200 kDa     |       |       |       |           |           |           |           |           |           | mean | 0.75      | 0.88      | 0.49 |
|                  |       |       |       |           |           |           |           |           |           | SD   | 0.11      | 0.31      | 0.41 |
| /actin           | 46.53 | 31.38 | 40.25 | 58.21     | 55.96     | 28.70     | 53.16     | 28.00     | 4.37      | 1.00 | 1.18      | 0.67      |      |
|                  | 0.83  | 0.62  | 0.79  | 1.08      | 1.03      | 0.52      | 0.91      | 0.48      | 0.09      | 0.15 | 0.41      | 0.55      |      |
| rel (meanPBS)    | 1.11  | 0.83  | 1.06  | 1.45      | 1.38      | 0.70      | 1.22      | 0.64      | 0.12      | 1.00 | 1.18      | 0.67      |      |
|                  |       |       |       |           |           |           |           |           |           | SD   | 0.15      | 0.41      | 0.55 |
| Actin 42 kDa     |       |       |       |           |           |           |           |           |           |      |           |           |      |
|                  | 56.30 | 50.42 | 50.66 | 53.81     | 54.22     | 54.96     | 58.20     | 58.79     | 49.36     |      |           |           |      |

  

|                  | PBS   | PBS   | PBS   | 3 (20 µM) | 3 (20 µM) | 3 (20 µM) | 4 (20 µM) | 4 (20 µM) | 4 (20 µM) | PBS  | 3 (20 µM) | 4 (20 µM) |      |
|------------------|-------|-------|-------|-----------|-----------|-----------|-----------|-----------|-----------|------|-----------|-----------|------|
| Claudin 3 22 kDa |       |       |       |           |           |           |           |           |           | mean | 0.91      | 1.06      | 0.92 |
|                  |       |       |       |           |           |           |           |           |           | SD   | 0.17      | 0.03      | 0.04 |
| /actin           | 47.02 | 60.39 | 59.52 | 64.96     | 62.92     | 58.12     | 54.98     | 47.73     | 50.32     | 1.00 | 1.17      | 1.04      |      |
|                  | 0.71  | 1.00  | 1.00  | 1.09      | 1.07      | 1.02      | 0.96      | 0.88      | 0.90      | 0.18 | 0.04      | 0.05      |      |
| rel (meanPBS)    | 0.79  | 1.10  | 1.11  | 1.20      | 1.18      | 1.13      | 1.06      | 0.97      | 1.00      | 1.00 | 1.17      | 1.04      |      |
|                  |       |       |       |           |           |           |           |           |           | SD   | 0.76      | 0.07      | 0.41 |
| Claudin 4 22 kDa |       |       |       |           |           |           |           |           |           | mean | 0.61      | 1.23      | 1.14 |
|                  |       |       |       |           |           |           |           |           |           | SD   | 0.47      | 0.05      | 0.25 |
| /actin           | 12.00 | 33.25 | 65.83 | 70.44     | 73.77     | 71.76     | 81.09     | 50.69     | 59.09     | 1.00 | 2.00      | 1.90      |      |
|                  | 0.18  | 0.55  | 1.11  | 1.18      | 1.25      | 1.26      | 1.42      | 0.93      | 1.06      | 0.76 | 0.07      | 0.41      |      |
| rel (meanPBS)    | 0.30  | 0.90  | 1.81  | 1.92      | 2.03      | 2.06      | 2.31      | 1.52      | 1.72      | 1.00 | 2.00      | 1.90      |      |
|                  |       |       |       |           |           |           |           |           |           | SD   | 0.31      | 0.36      | 0.55 |
| ZO-1 200 kDa     |       |       |       |           |           |           |           |           |           | mean | 0.41      | 0.17      | 0.26 |
|                  |       |       |       |           |           |           |           |           |           | SD   | 0.13      | 0.15      | 0.23 |
| /actin           | 30.61 | 16.07 | 29.57 | 19.08     | 8.90      | 1.56      | 26.86     | 15.08     | 1.02      | 1.00 | 0.40      | 0.48      |      |
|                  | 0.46  | 0.27  | 0.50  | 0.32      | 0.15      | 0.03      | 0.47      | 0.28      | 0.02      | 0.31 | 0.36      | 0.55      |      |
| rel (meanPBS)    | 1.13  | 0.65  | 1.22  | 0.78      | 0.37      | 0.07      | 1.15      | 0.68      | 0.04      | 1.00 | 0.40      | 0.48      |      |
|                  |       |       |       |           |           |           |           |           |           | SD   | 0.31      | 0.36      | 0.55 |
| Actin 42 kDa     |       |       |       |           |           |           |           |           |           |      |           |           |      |
|                  | 65.93 | 60.31 | 59.27 | 59.78     | 59.02     | 56.79     | 57.07     | 54.27     | 55.73     |      |           |           |      |

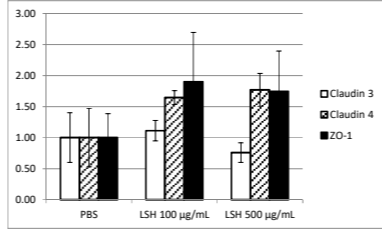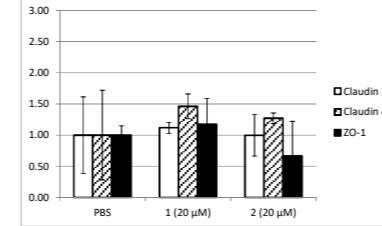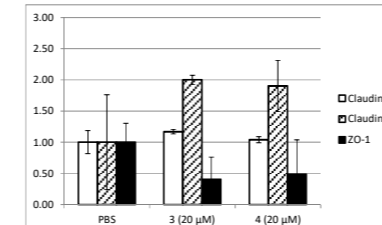

Supplement: np0c00776_si_002.pdf [file np0c00776_si_002.pdf]
