# Supplementary material
Source: PubMed Central journal article supplement (PMC7771025)
Supplement: np0c00776_si_003.pdf [file np0c00776_si_003.pdf]

## Supporting Information for:

*Lythrum salicaria* Ellagitannins Stimulate IPEC-J2 Cells Monolayer Formation and Inhibit Enteropathogenic *Escherichia coli* Growth and Adhesion.

Sebastian Granica,<sup>†,‡</sup> Wilfried Vahjen,<sup>§</sup> Jürgen Zentek,<sup>§</sup> Matthias F. Melzig,<sup>^</sup> Karolina A. Pawłowska,<sup>†,‡</sup> and Jakub P. Piwowarski\*<sup>†,‡,§,^</sup>

<sup>†</sup>Department of Pharmacognosy and Molecular Basis of Phytotherapy, and <sup>‡</sup>Centre for Preclinical Studies, Medical University of Warsaw, Poland

<sup>§</sup>Institute of Animal Nutrition, and <sup>^</sup>Department of Pharmaceutical Biology, Freie Universität Berlin, Germany

## Corresponding Author

**Jakub P. Piwowarski** – Department of Pharmacognosy and Molecular Basis of Phytotherapy, Faculty of Pharmacy, Medical University of Warsaw, Banacha 1, Warsaw 02-097, Poland; Institute of Animal Nutrition, and Department of Pharmaceutical Biology, Freie Universität Berlin, Germany; [orcid.org/0000-0002-5011-0983](https://orcid.org/0000-0002-5011-0983); Phone: +48 225720953; Email: [jpiwowarski@wum.edu.pl](mailto:jpiwowarski@wum.edu.pl)

**Table S2.** Spearman correlation analysis between TEER and TJ levels in IPEC-J2 monolayers cultured from day 7 in medium containing *Lythrum salicaria extract* (LSH) at concentration of 100 and 500 µg/mL, castalagin (**1**), vescalagin (**2**), salicarinin A (**3**) or salicarinin B (**4**) at the concentration 20 µM.

|          | Conc [µg/mL or µM] | TEER | Claudin 3 | Claudin 4 | ZO-1 |                           | N | R (Spearman) | t(N-2)    | p        |
|----------|--------------------|------|-----------|-----------|------|---------------------------|---|--------------|-----------|----------|
| PBS      | 0                  | 1953 | 0.58      | 0.47      | 1.43 |                           |   |              |           |          |
| PBS      | 0                  | 2173 | 1.05      | 1.16      | 0.86 | <b>Conc vs. TEER</b>      | 9 | 0.948683     | 7.937254  | 0.000096 |
| PBS      | 0                  | 2228 | 1.37      | 1.37      | 0.70 | <b>TEER vs. Claudin 3</b> | 9 | -0.216667    | -0.587195 | 0.575515 |
| LSH      | 100                | 2355 | 1.09      | 1.55      | 2.78 | <b>TEER vs. Claudin 4</b> | 9 | 0.783333     | 3.334136  | 0.012520 |
| LSH      | 100                | 2514 | 1.29      | 1.62      | 1.22 | <b>TEER vs. ZO-1</b>      | 9 | 0.266667     | 0.732042  | 0.487922 |
| LSH      | 100                | 2387 | 0.96      | 1.77      | 1.71 |                           |   |              |           |          |
| LSH      | 500                | 3040 | 0.83      | 2.07      | 2.27 |                           |   |              |           |          |
| LSH      | 500                | 3054 | 0.87      | 1.57      | 1.99 |                           |   |              |           |          |
| LSH      | 500                | 3109 | 0.58      | 1.68      | 1.03 |                           |   |              |           |          |
| PBS      | 0                  | 1953 | 0.29      | 0.29      | 1.11 |                           |   |              |           |          |
| PBS      | 0                  | 2173 | 1.31      | 0.98      | 0.83 | <b>Conc vs. TEER</b>      | 9 | 0.821584     | 3.812933  | 0.006603 |
| PBS      | 0                  | 2228 | 1.40      | 1.73      | 1.06 | <b>TEER vs. Claudin 3</b> | 9 | -0.066667    | -0.176777 | 0.864690 |
| <b>1</b> | 20                 | 2654 | 1.19      | 1.62      | 1.45 | <b>TEER vs. Claudin 4</b> | 9 | 0.383333     | 1.098087  | 0.308495 |
| <b>1</b> | 20                 | 2642 | 1.02      | 1.52      | 1.38 | <b>TEER vs. ZO-1</b>      | 9 | 0.050000     | 0.132453  | 0.898353 |
| <b>1</b> | 20                 | 2592 | 1.15      | 1.24      | 0.70 |                           |   |              |           |          |
| <b>2</b> | 20                 | 2672 | 1.27      | 1.20      | 1.22 |                           |   |              |           |          |
| <b>2</b> | 20                 | 2532 | 0.96      | 1.27      | 0.64 |                           |   |              |           |          |
| <b>2</b> | 20                 | 2843 | 0.60      | 1.37      | 0.12 |                           |   |              |           |          |
| PBS      | 0                  | 1953 | 0.79      | 0.30      | 1.13 |                           |   |              |           |          |
| PBS      | 0                  | 2173 | 1.10      | 0.90      | 0.65 | <b>Conc vs. TEER</b>      | 9 | 0.821584     | 3.812933  | 0.006603 |
| PBS      | 0                  | 2228 | 1.11      | 1.81      | 1.22 | <b>TEER vs. Claudin 3</b> | 9 | 0.233333     | 0.634866  | 0.545699 |
| <b>3</b> | 20                 | 2712 | 1.20      | 1.92      | 0.78 | <b>TEER vs. Claudin 4</b> | 9 | 0.666667     | 2.366432  | 0.049867 |
| <b>3</b> | 20                 | 2622 | 1.18      | 2.03      | 0.37 | <b>TEER vs. ZO-1</b>      | 9 | 0.050000     | 0.132453  | 0.898353 |
| <b>3</b> | 20                 | 2572 | 1.13      | 2.06      | 0.07 |                           |   |              |           |          |
| <b>4</b> | 20                 | 2812 | 1.06      | 2.31      | 1.15 |                           |   |              |           |          |
| <b>4</b> | 20                 | 2809 | 0.97      | 1.52      | 0.68 |                           |   |              |           |          |
| <b>4</b> | 20                 | 2522 | 1.00      | 1.72      | 0.04 |                           |   |              |           |          |
